# Supplementary material for: A novel Li2FeSiO4/C composite: Synthesis, characterization and high storage capacity
Source: Royal Society of Chemistry journal article supplement (doi:10.1039/c0jm03928d), 2011-01-01
Supplement: c0jm03928d.pdf [file c0jm03928d.pdf]

# Supplementary Information: Journal of Materials Chemistry

## Novel Li<sub>2</sub>FeSiO<sub>4</sub>/C Composite: Synthesis, Characterization and High Storage Capacity

Dongping Lv,<sup>a</sup> Wen Wen,<sup>b</sup> Xingkang Huang,<sup>a</sup> Jingyu Bai,<sup>a</sup> Jinxiao Mi,<sup>c</sup>

Shunqing Wu<sup>d</sup> and Yong Yang<sup>a,\*</sup>

<sup>a</sup> *State Key Laboratory for Physical Chemistry of Solid Surfaces, College of Chemistry and Chemical*

*Engineering, Department of Chemistry, Xiamen University, Xiamen, 361005 (P. R.China)*

*E-mail: [yyang@xmu.edu.cn](mailto:yyang@xmu.edu.cn), Tel: +86-592-218-5753*

<sup>b</sup> *Shanghai Synchrotron Radiation Facility, Shanghai Institute of Applied Physics, Chinese Academy of Science, Shanghai, 201204 China*

<sup>c</sup> *Department of Materials Science and Engineering, College of Materials, Xiamen University, China*

<sup>d</sup> *Department of Physics, School of Physics and Mechanical and Electrical Engineering, Xiamen University, China*

---

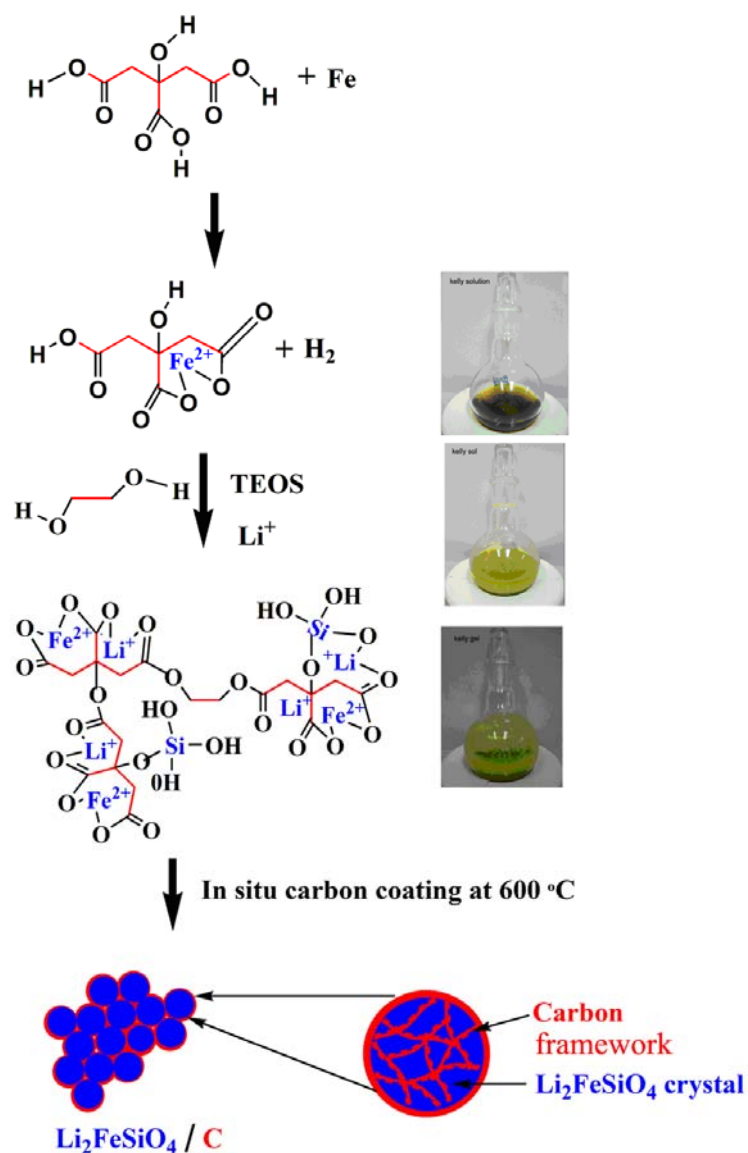

**Figure S1.** Schematic illustration of the synthesis procedure.

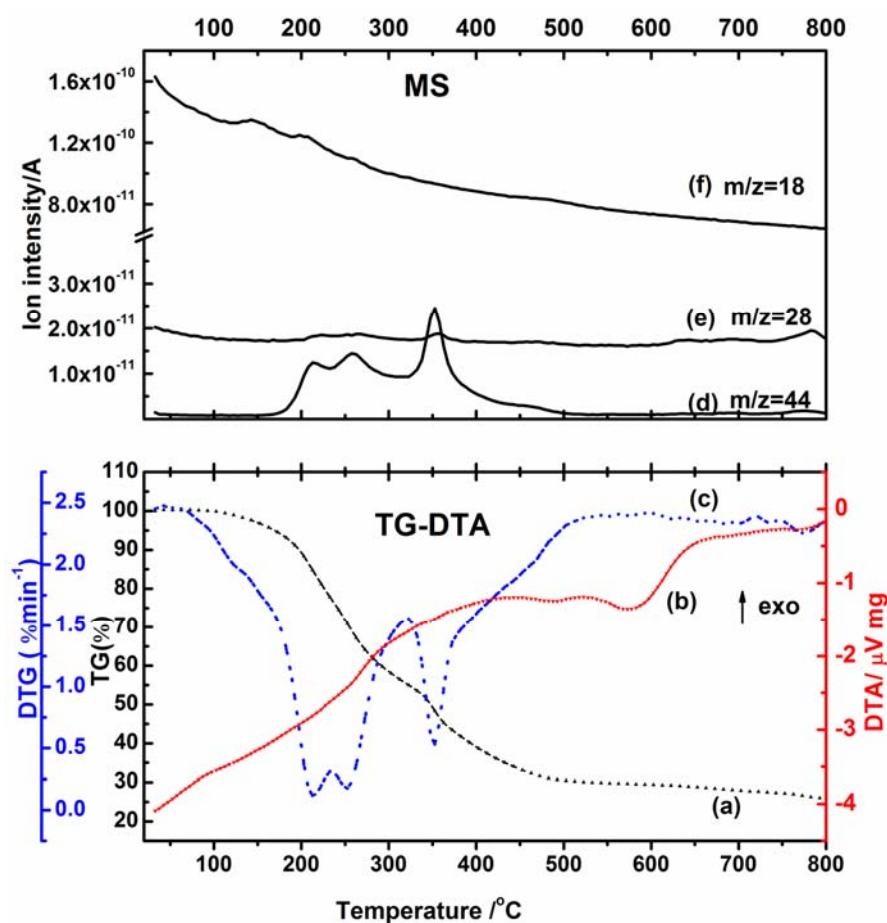

**Figure S2.** TG/DTA plots and the coupled mass spectra of the precursor: (a)TG, (b) DTA, (c) DTG, (d)  $m/z = 44$ , (e)  $m/z = 28$ , and (f)  $m/z = 18$ .

The decomposition process of the precursor (namely the as-obtained xerogel) was studied by TG-MS as shown in Fig. S2. TG curve, corroborated by MS analysis, can be divided into three regions i.e., from room temperature to 150 °C, 150-500 °C, and 500-800 °C (labeled as R1, R2, and R3, respectively). In region R1, the weight loss of 5 wt% below 150 °C is related to the dehydration of physically adsorbed water in precursor. In region R2, there is a significant weight loss of 65 wt%, which were ascribed to the decomposition processes of organic groups from acetate ion or citric acid,<sup>40</sup> proved by the coupled MS analysis (Fig. S2 d). In a high temperature range of R3, a large endothermic peak was observed at around 590 °C without obvious weight loss (Fig. S2b), which corresponded to the crystallization of  $\text{Li}_2\text{FeSiO}_4$ ; the slight release of CO at 790 °C (Fig. 2c) may relate to the reaction between the  $\text{Li}_2\text{FeSiO}_4$  and its compact carbon coating layer.

Based on the analysis of TG-MS, we can choose the precalcination (ca. 400 °C) and calcination (ca. 600 °C) temperatures efficiently in our synthesis process. Herein, we selected 400 °C instead of 500 °C as the precalcination temperature because a slower heating rate of 2 °C min<sup>-1</sup> was adopted in our material synthesis process compared to that of 10 °C min<sup>-1</sup> in TG-MS experiment. In fact, a slower heating rate is known to lead to an apparent shift of the decomposition steps to a lower temperature.
